# Supplementary material
Source: publisher figshare collection journal article supplement (https://brill.figshare.com/ndownloader/files/34268492)
Supplement: Supplementary file 1 [file 34268492]

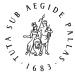

BRILL

## Supporting Online Materials

This is a supplement to Korotayev, A., Medvedev, I., & Zinkina, J. (2022). Global Systems for Sociopolitical Instability Forecasting and Their Efficiency, *Comparative Sociology*, 21(1).

TABLE S1 Descriptive statistics

|                                                                               | N    | Minimum | Maximum   | Mean    | Std.<br>Deviation |
|-------------------------------------------------------------------------------|------|---------|-----------|---------|-------------------|
| State Fragility Index (SFI)                                                   | 2111 | 0       | 25.0      | 8.27    | 6.25              |
| Fragile States Index (FSI)                                                    | 2556 | 14.627  | 114.90    | 69.67   | 23.78             |
| Political Instability Index (PII)                                             | 324  | .20     | 8.80      | 5.03    | 1.86              |
| Country Indicators for Foreign<br>Policy: Failed and Fragile States<br>(CIFP) | 582  | 2.23    | 7.81      | 4.81    | 1.15              |
| CNTS weighted conflict measure<br>(domestic9)                                 | 2774 | 0       | 1707875.0 | 5738.69 | 43108.28          |
| logarithm of the CNTS weighted<br>conflict measure (domestic9 log)            | 2774 | 0.001   | 14.35     | 4.09    | 3.85              |

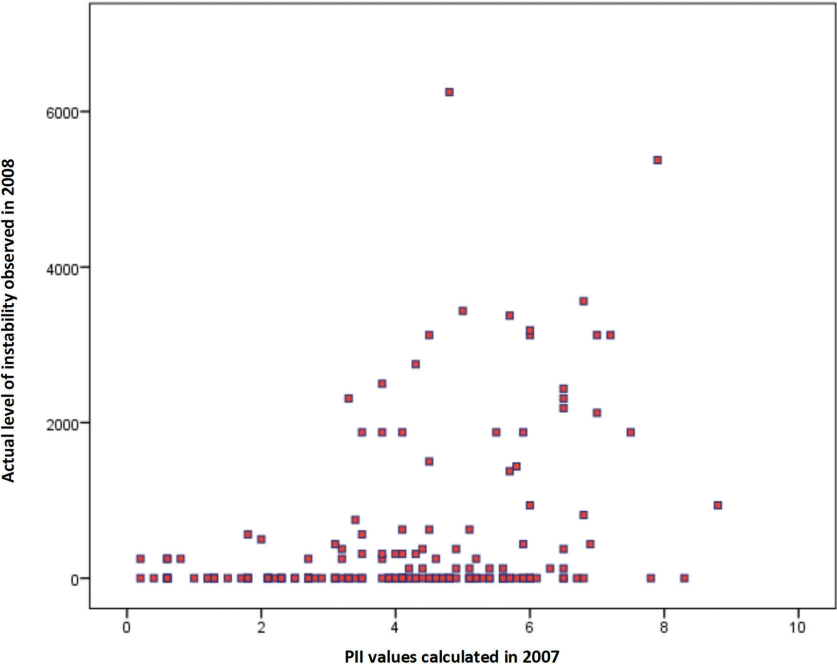

FIGURE S1 Correlation between Political Instability Index (PII) values calculated in 2007 and the actual level of instability observed in 2008 (measured through the CNTS weighted conflict measure)

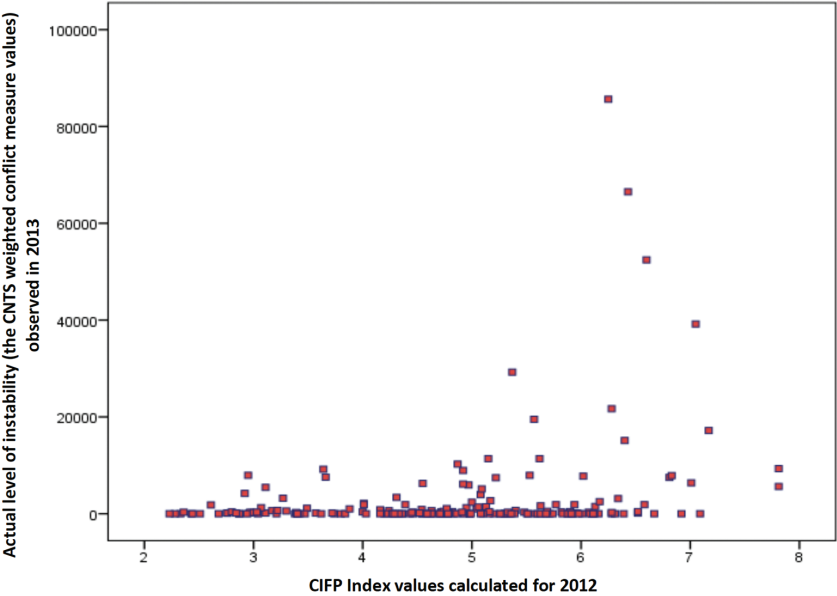

FIGURE S2 Correlation between the Country Indicators for Foreign Policy (CIFP) Index values for 2012 and the CNTS weighted conflict measure values for 2013

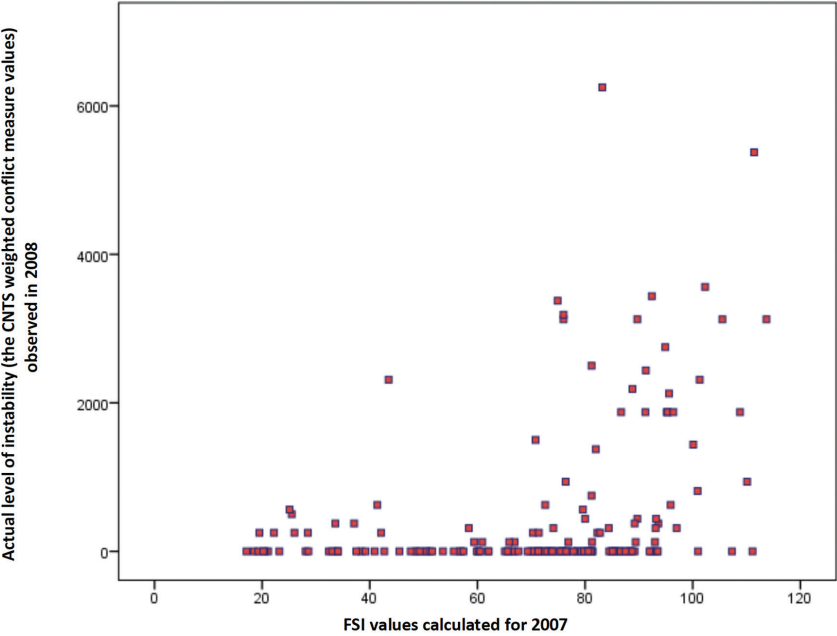

FIGURE S3 Correlation between the Fragile State Index (FSI) values for 2007 and the CNTS weighted conflict measure values for 2008

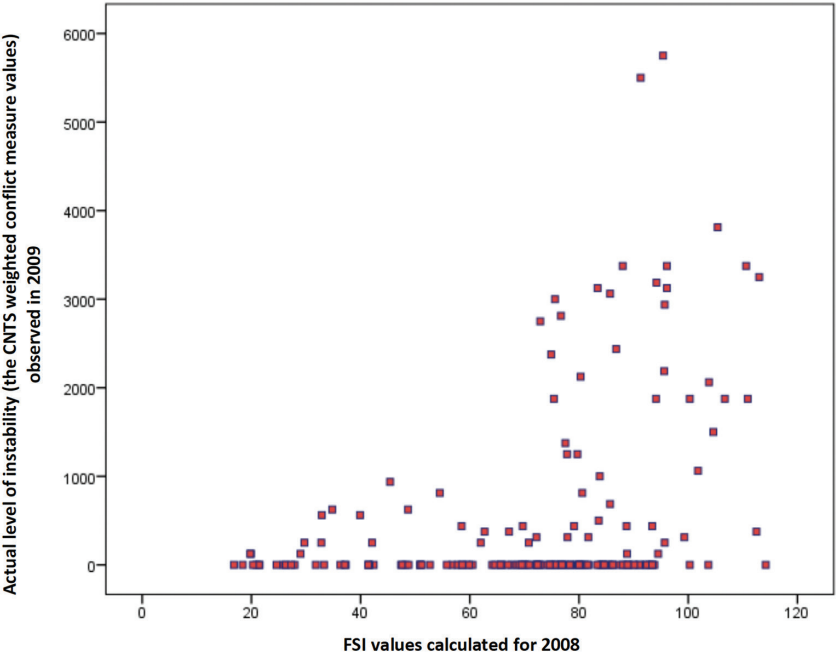

FIGURE S4 Correlation between the Fragile State Index (FSI) values for 2008 and the CNTS weighted conflict measure values for 2009

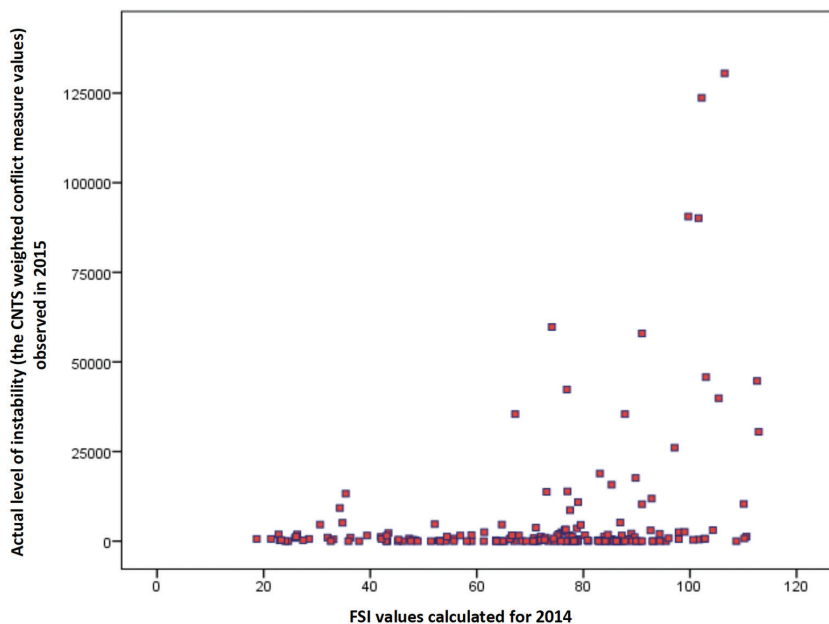

FIGURE S5 Correlation between the Fragile State Index (FSI) values for 2014 and the CNTS weighted conflict measure values for 2015

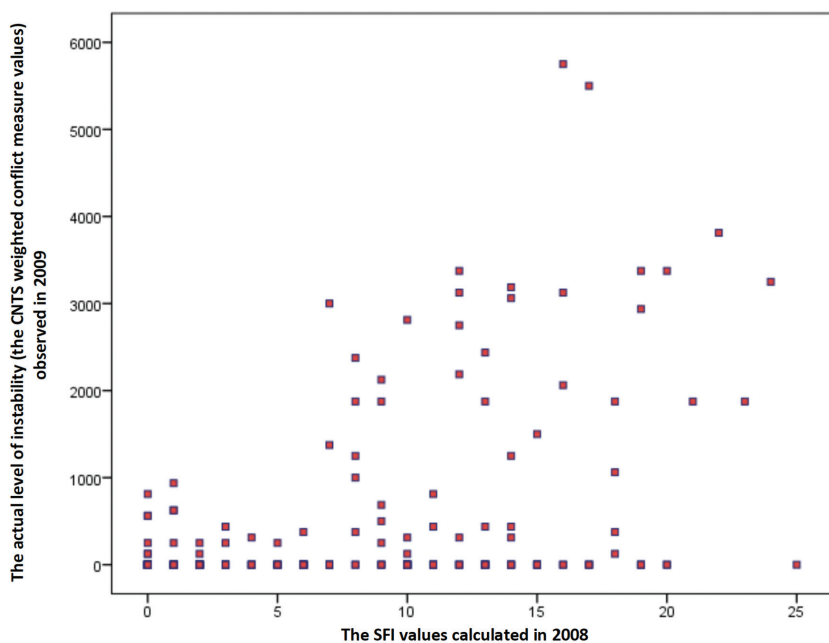

*Note:*  $r = 0.404$ ,  $p < 0.001$ .

FIGURE S6 Correlation between the Fragile State Index (FSI) values for 2008 and the CNTS weighted conflict measure values for 2009

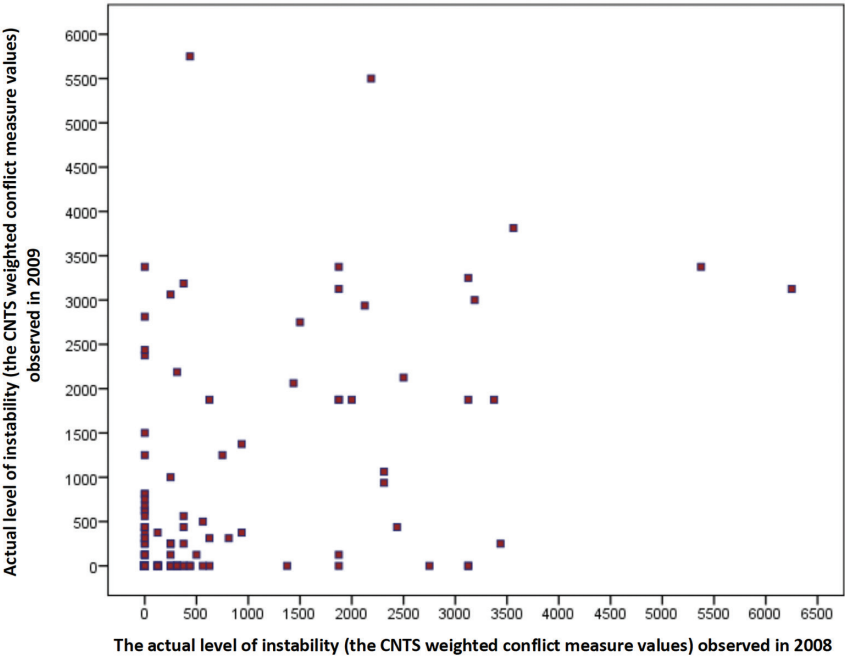

*Note:*  $r = 0.554, p < 0.001$ .  
FIGURE S7 Correlation between the actual level of instability (measured through the CNTS weighted conflict measure) calculated in 2008 and the actual level of instability (measured through the CNTS weighted conflict measure) observed in 2009

TABLE S2 Correlation between dichotomized SFI values for 2008 and dichotomized CNTS weighted conflict measure for 2009

|                                      |                                 | Dichotomized CNTS weighted conflict measure for 2009 |                                            | Total |
|--------------------------------------|---------------------------------|------------------------------------------------------|--------------------------------------------|-------|
|                                      |                                 | 0 = low level of instability ( $\leq 1000$ )         | 1 = high level of instability ( $> 1000$ ) |       |
| The dichotomized SFI values for 2008 | 0 = low SFI scores ( $\leq 6$ ) | 69                                                   | 0                                          | 69    |
|                                      |                                 | 100%                                                 | 0%                                         | 100%  |
|                                      | 1 = high SFI scores ( $> 6$ )   | 65                                                   | 31                                         | 96    |
|                                      |                                 | 67.7%                                                | 32.3%                                      | 100%  |
| Total                                |                                 | 134                                                  | 31                                         | 165   |

*Note:*  $r = 0.408, p < 0.001; \gamma = 1.0, p < 0.001$ .

TABLE S3    Correlation between the dichotomized CNTS index for 2008 and the dichotomized CNTS index for 2009

|                                                                  |                                                 | Dichotomized CNTS weighted<br>conflict measure for 2009 |                                             | Total       |
|------------------------------------------------------------------|-------------------------------------------------|---------------------------------------------------------|---------------------------------------------|-------------|
|                                                                  |                                                 | 0 = low level<br>of instability<br>(≤ 350)              | 1 = high level<br>of instability<br>(> 350) |             |
| Dichotomized<br>CNTS weighted<br>conflict<br>measure for<br>2008 | 0 = low level<br>of instability<br>(≤1000)      | 158<br>92.4%                                            | 13<br>7.6%                                  | 171<br>100% |
|                                                                  | 1 = high<br>level of<br>instability<br>(> 1000) | 9<br>33.3%                                              | 18<br>66.7%                                 | 27<br>100%  |
|                                                                  |                                                 |                                                         |                                             |             |
|                                                                  |                                                 |                                                         |                                             |             |
| Total                                                            |                                                 | 167<br>84.3%                                            | 31<br>15.7%                                 | 198<br>100% |

*Note:*  $r = 0.558, p < 0.001; \gamma = 0.921, p < 0.001.$
